# Supplementary material for: Eleganolone, a Diterpene from the French Marine Alga Bifurcaria bifurcata Inhibits Growth of the Human Pathogens Trypanosoma brucei and Plasmodium falciparum
Source: MDPI journal article supplement (doi:10.3390/md11030599), 2013-02-26
Supplement: s1 [file s1]

marinedrugs-11-00599-s001.mol
  corina  04161403423D 1   1.00000     0.00000 
CORINA 3.49 0023  12.04.2013
 22 21  0  0  0  0  0  0  0  0999 V2000
    1.2517   -4.0109    5.3068 O   0  0  0  0  0  0  0  0  0  0  0  0
    1.0750   -4.1430    3.8949 C   0  0  0  0  0  0  0  0  0  0  0  0
   -0.3481   -3.8045    3.5329 C   0  0  0  0  0  0  0  0  0  0  0  0
   -1.0806   -4.6699    2.8766 C   0  0  0  0  0  0  0  0  0  0  0  0
   -2.5229   -4.3580    2.5711 C   0  0  0  0  0  0  0  0  0  0  0  0
   -2.6285   -3.7557    1.1686 C   0  0  0  0  0  0  0  0  0  0  0  0
   -4.0709   -3.4438    0.8631 C   0  0  0  0  0  0  0  0  0  0  0  0
   -4.4351   -2.2112    0.6100 C   0  0  0  0  0  0  0  0  0  0  0  0
   -5.8612   -1.9104    0.2269 C   0  0  0  0  0  0  0  0  0  0  0  0
   -6.6485   -1.5005    1.4732 C   0  0  0  0  0  0  0  0  0  0  0  0
   -8.0746   -1.1997    1.0901 C   0  0  0  0  0  0  0  0  0  0  0  0
   -9.0485   -1.9409    1.5572 C   0  0  0  0  0  0  0  0  0  0  0  0
  -10.4736   -1.6477    1.1643 C   0  0  0  0  0  0  0  0  0  0  0  0
  -10.8595   -2.5128   -0.0078 C   0  0  0  0  0  0  0  0  0  0  0  0
  -12.2025   -2.4142   -0.5786 C   0  0  0  0  0  0  0  0  0  0  0  0
  -12.5163   -3.1135   -1.6711 C   0  0  0  0  0  0  0  0  0  0  0  0
  -11.4382   -3.8310   -2.4419 C   0  0  0  0  0  0  0  0  0  0  0  0
   -0.4808   -5.9772    2.4270 C   0  0  0  0  0  0  0  0  0  0  0  0
  -10.0562   -3.2910   -0.4779 O   0  0  0  0  0  0  0  0  0  0  0  0
  -13.9486   -3.1858   -2.1340 C   0  0  0  0  0  0  0  0  0  0  0  0
   -8.7439   -3.0866    2.4876 C   0  0  0  0  0  0  0  0  0  0  0  0
   -3.4280   -1.0939    0.7021 C   0  0  0  0  0  0  0  0  0  0  0  0
  1  2  1  0      
  2  3  1  0      
  3  4  2  0      
  4  5  1  0      
  5  6  1  0      
  6  7  1  0      
  7  8  2  0      
  8  9  1  0      
  9 10  1  0      
 10 11  1  0      
 11 12  2  0      
 12 13  1  0      
 13 14  1  0      
 14 15  1  0      
 15 16  2  0      
 16 17  1  0      
  4 18  1  0      
 14 19  2  0      
 16 20  1  0      
 12 21  1  0      
  8 22  1  0      
M  END
$$$$
