# Supplementary material for: Eleganolone, a Diterpene from the French Marine Alga Bifurcaria bifurcata Inhibits Growth of the Human Pathogens Trypanosoma brucei and Plasmodium falciparum
Source: MDPI journal article supplement (doi:10.3390/md11030599), 2013-02-26
Supplement: s2 [file s2]

marinedrugs-11-00599-s001.mol
  ChemDraw03251423592D

 22 21  0  0  0  0  0  0  0  0999 V2000
   -5.7158   -0.6188    0.0000 O   0  0  0  0  0  0  0  0  0  0  0  0
   -5.0013   -0.2062    0.0000 C   0  0  0  0  0  0  0  0  0  0  0  0
   -4.2868   -0.6188    0.0000 C   0  0  0  0  0  0  0  0  0  0  0  0
   -3.5724   -0.2062    0.0000 C   0  0  0  0  0  0  0  0  0  0  0  0
   -2.8579   -0.6188    0.0000 C   0  0  0  0  0  0  0  0  0  0  0  0
   -2.1434   -0.2062    0.0000 C   0  0  0  0  0  0  0  0  0  0  0  0
   -1.4289   -0.6188    0.0000 C   0  0  0  0  0  0  0  0  0  0  0  0
   -0.7145   -0.2062    0.0000 C   0  0  0  0  0  0  0  0  0  0  0  0
   -0.0000   -0.6188    0.0000 C   0  0  0  0  0  0  0  0  0  0  0  0
    0.7145   -0.2062    0.0000 C   0  0  0  0  0  0  0  0  0  0  0  0
    1.4289   -0.6188    0.0000 C   0  0  0  0  0  0  0  0  0  0  0  0
    2.1434   -0.2062    0.0000 C   0  0  0  0  0  0  0  0  0  0  0  0
    2.8579   -0.6188    0.0000 C   0  0  0  0  0  0  0  0  0  0  0  0
    3.5724   -0.2062    0.0000 C   0  0  0  0  0  0  0  0  0  0  0  0
    4.2868   -0.6188    0.0000 C   0  0  0  0  0  0  0  0  0  0  0  0
    5.0013   -0.2062    0.0000 C   0  0  0  0  0  0  0  0  0  0  0  0
    5.7158   -0.6188    0.0000 C   0  0  0  0  0  0  0  0  0  0  0  0
   -3.5724    0.6188    0.0000 C   0  0  0  0  0  0  0  0  0  0  0  0
    3.5724    0.6188    0.0000 O   0  0  0  0  0  0  0  0  0  0  0  0
    5.0013    0.6188    0.0000 C   0  0  0  0  0  0  0  0  0  0  0  0
    2.1434    0.6188    0.0000 C   0  0  0  0  0  0  0  0  0  0  0  0
   -0.7145    0.6188    0.0000 C   0  0  0  0  0  0  0  0  0  0  0  0
  1  2  1  0      
  2  3  1  0      
  3  4  2  0      
  4  5  1  0      
  5  6  1  0      
  6  7  1  0      
  7  8  2  0      
  8  9  1  0      
  9 10  1  0      
 10 11  1  0      
 11 12  2  0      
 12 13  1  0      
 13 14  1  0      
 14 15  1  0      
 15 16  2  0      
 16 17  1  0      
  4 18  1  0      
 14 19  2  0      
 16 20  1  0      
 12 21  1  0      
  8 22  1  0      
M  END
